# Supplementary material for: Preparation of magnetic composites of MIL-53(Fe) or MIL-100(Fe) via partial transformation of their framework into γ-Fe2O3
Source: Royal Society of Chemistry journal article supplement (doi:10.1039/c6ta00383d), 2016-01-01
Supplement: c6ta00383d1.pdf [file c6ta00383d1.pdf]

## Electronic Supplementary Information

### **Preparation of magnetic composites of MIL-53(Fe) or MIL-100(Fe) via partial transformation of their framework into $\gamma$ -Fe<sub>2</sub>O<sub>3</sub>**

Igor Bezverkhyy\*<sup>1</sup>, Elena Popova<sup>2</sup>, Nicolas Geoffroy<sup>1</sup>, Frederic Herbst<sup>1</sup> and Jean-Pierre Bellat<sup>1</sup>

*1. Laboratoire Interdisciplinaire Carnot de Bourgogne, UMR6303 CNRS – Université de Bourgogne Franche - Comté, 9 avenue A. Savary, BP47870, 21078 Dijon Cedex, France*

*2. Groupe d'Etude de la Matière Condensée UMR 8635 CNRS-UVSQ, Université Paris-Saclay, 45 avenue des Etats-Unis, 78035 Versailles, France*

\*Corresponding author : [igor.bezverkhyy@u-bourgogne.fr](mailto:igor.bezverkhyy@u-bourgogne.fr)

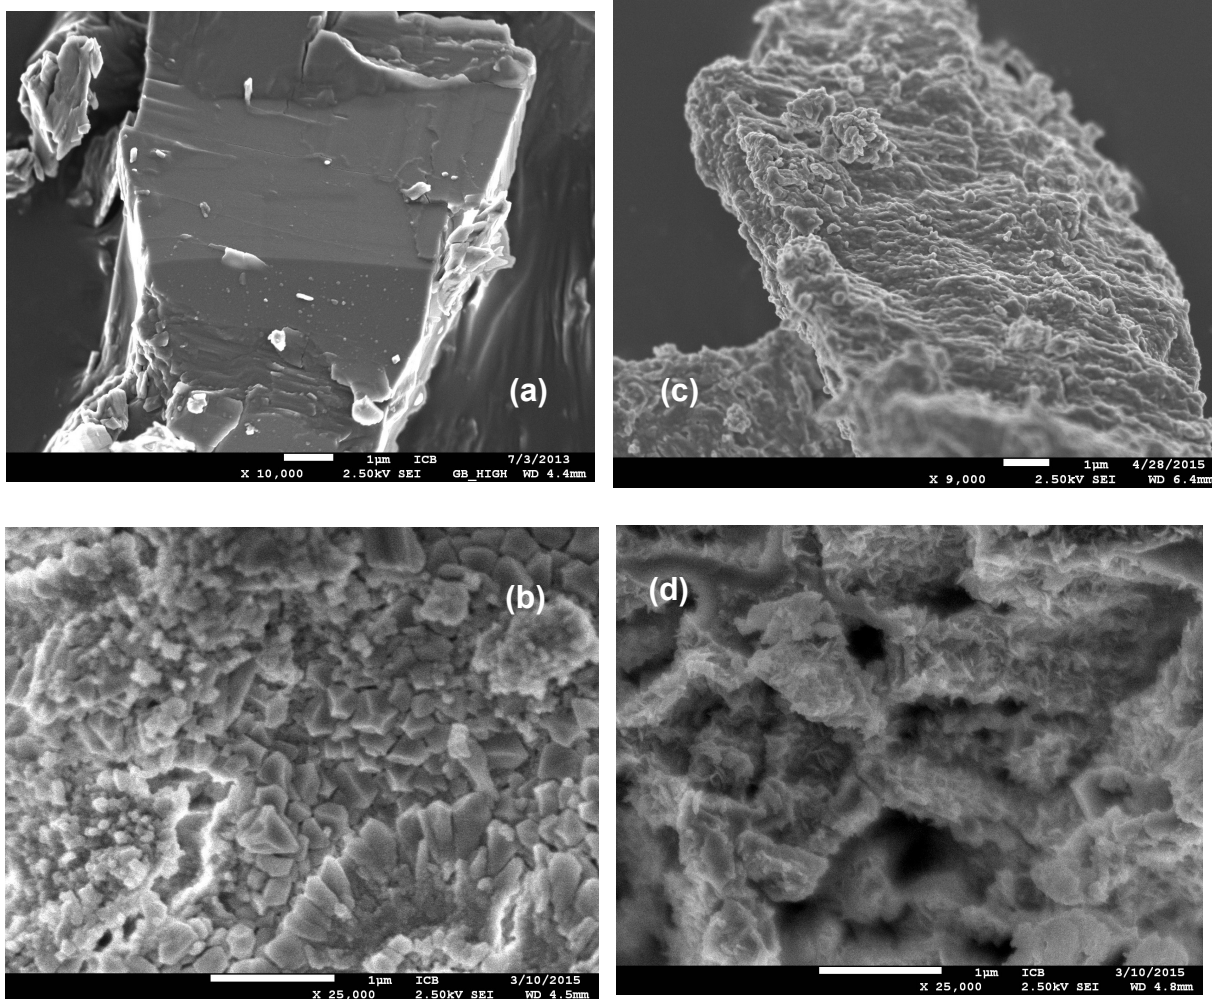

**Figure S1** SEM images of pristine MOFs MIL-53(Fe) (a), MIL-100(Fe) (b) and of **53-H** (c) and **100-H** (d).

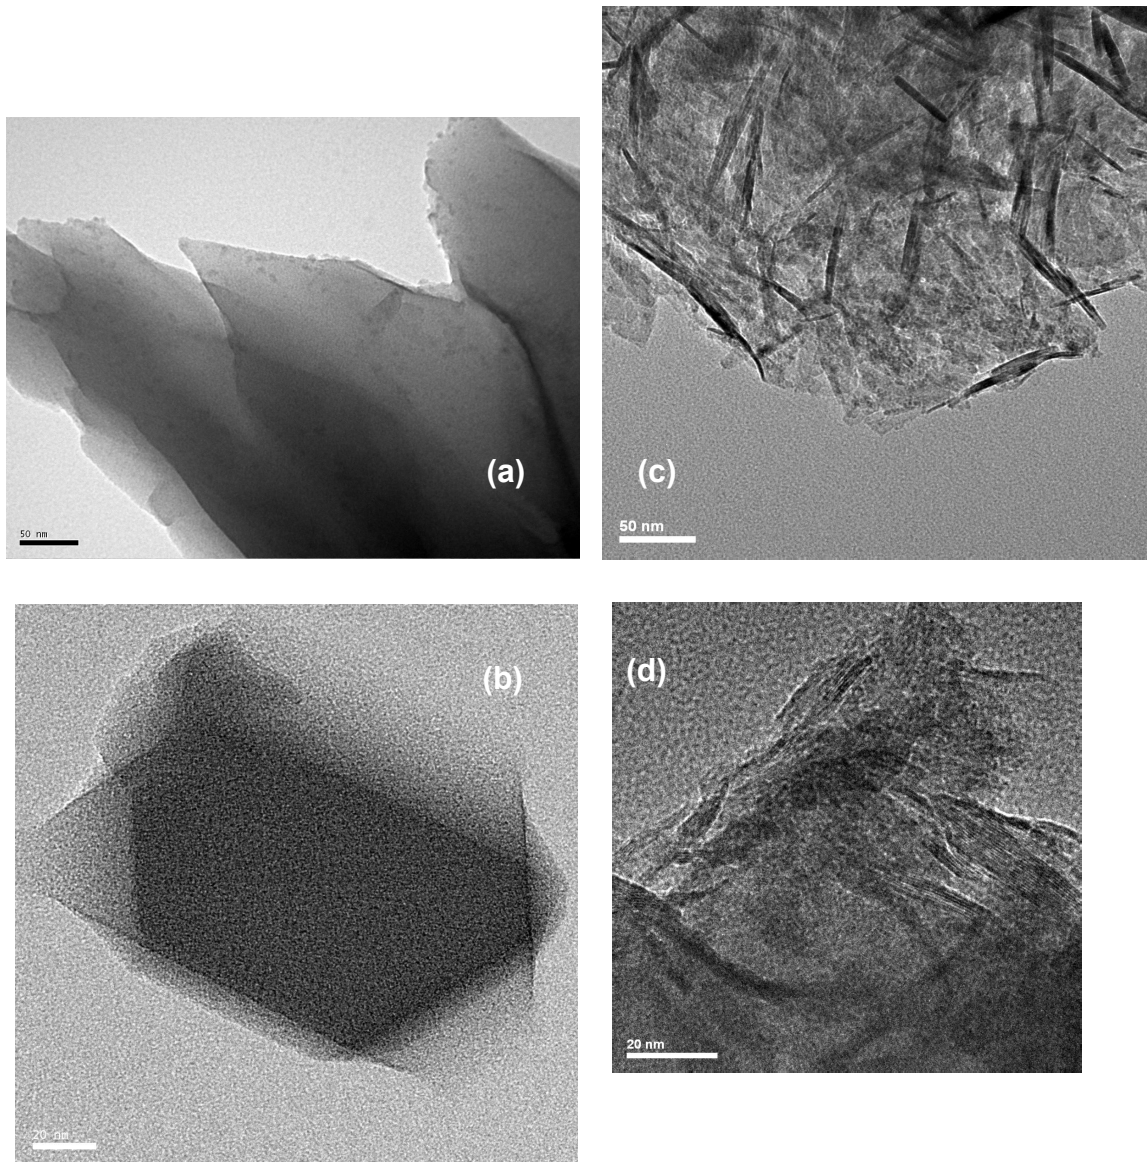

**Figure S2** TEM images of pristine MOFs MIL-53(Fe) (a), MIL-100(Fe) (b) and of 53-H (c) and 100-H (d).

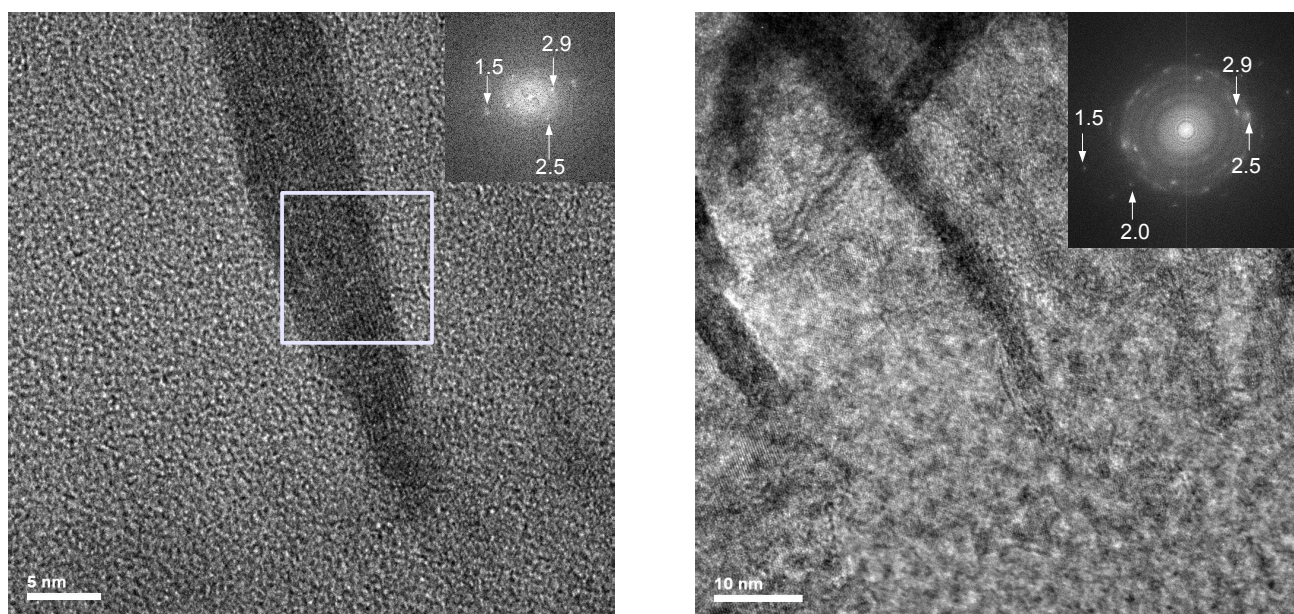

**Figure S3** HRTEM images of **100-Hc** (left) and **53-Hc** (right). Inserts – Fourier transforms of the region in the square (**100-Hc**) and of the whole image (**53-Hc**) with the corresponding lattice distances in Å.

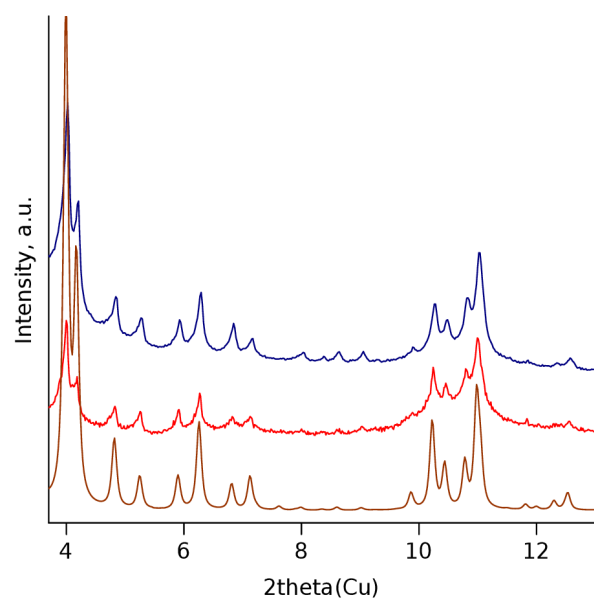

**Figure S4** Low-angle range of XRD patterns of MIL-100(Fe) (red), **100-Hc** (blue) and calculated MIL-100(Fe) (brown).

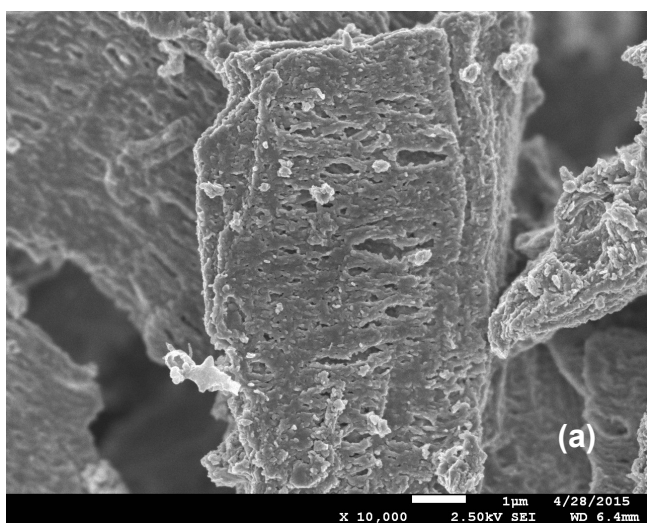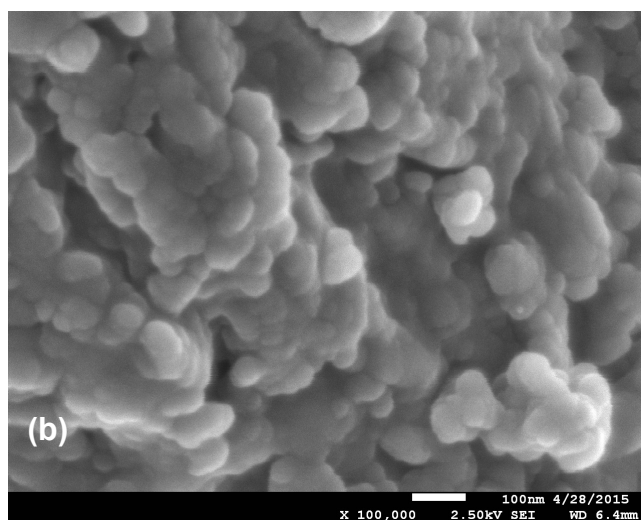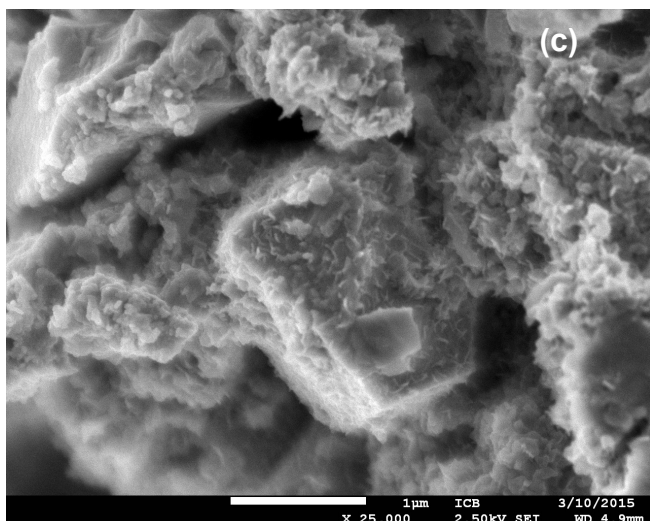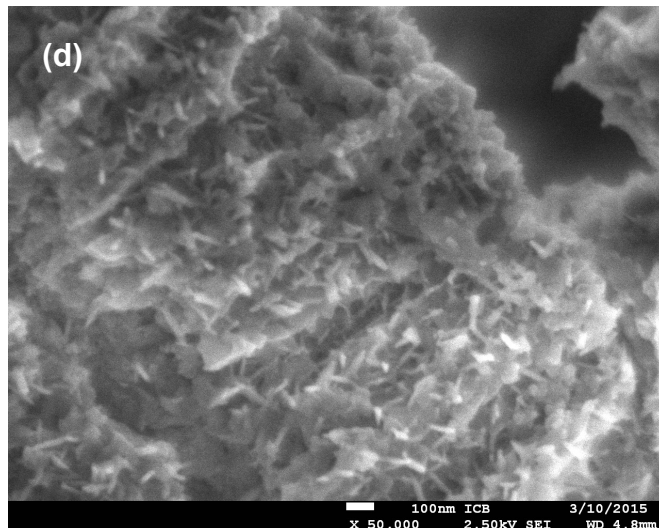

**Figure S5** SEM images of **53-Hc** (a),(b) and **100-Hc** (c), (d).

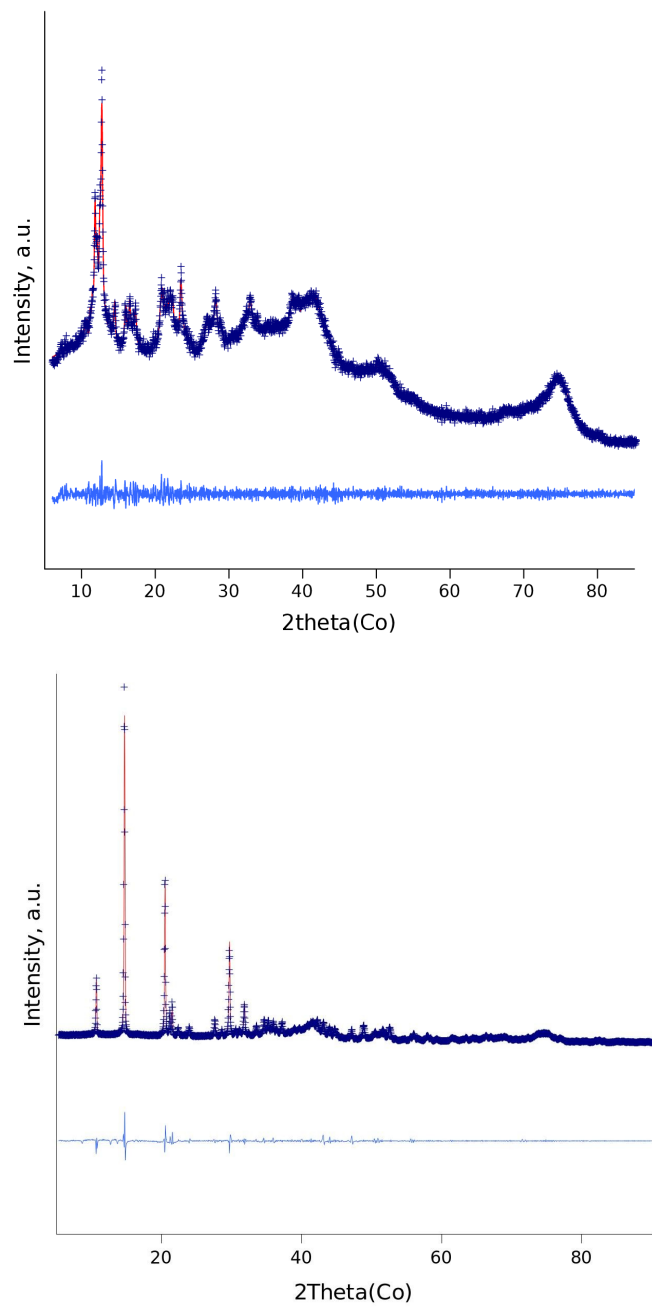

**Figure S6** Full profile Le Bail fits of the XRD patterns of **100-Hc** (top) and **53-Hc** (bottom). Crosses – experimental data, red line – fit, blue line – difference.

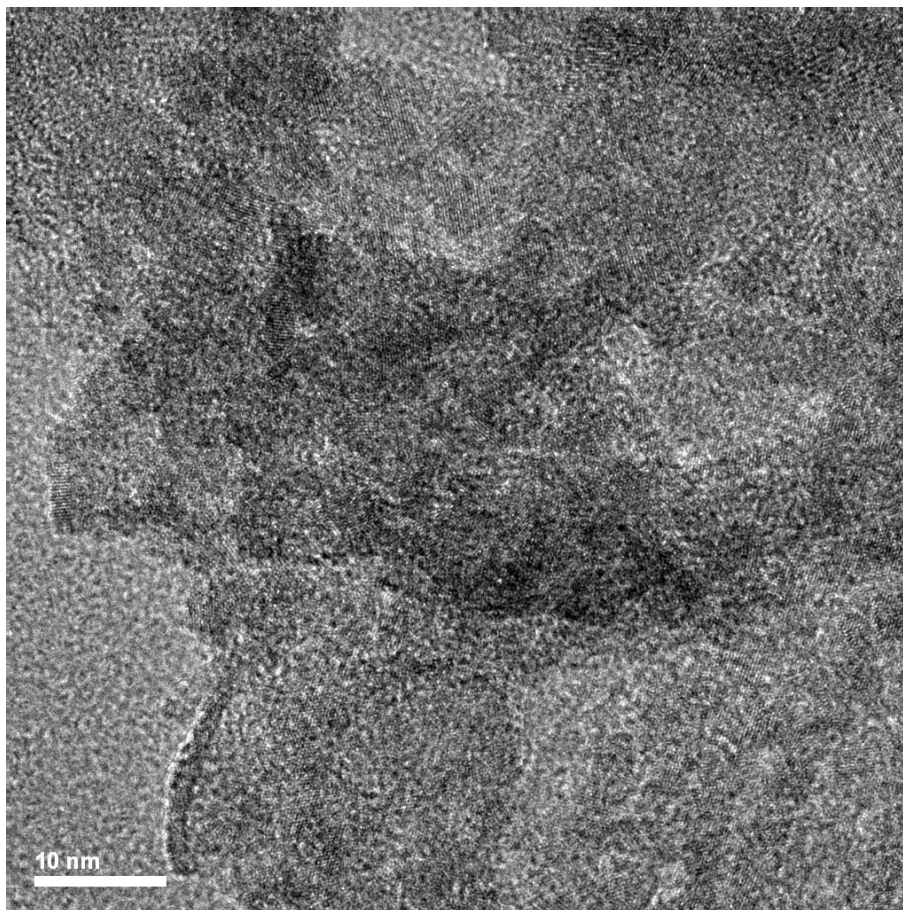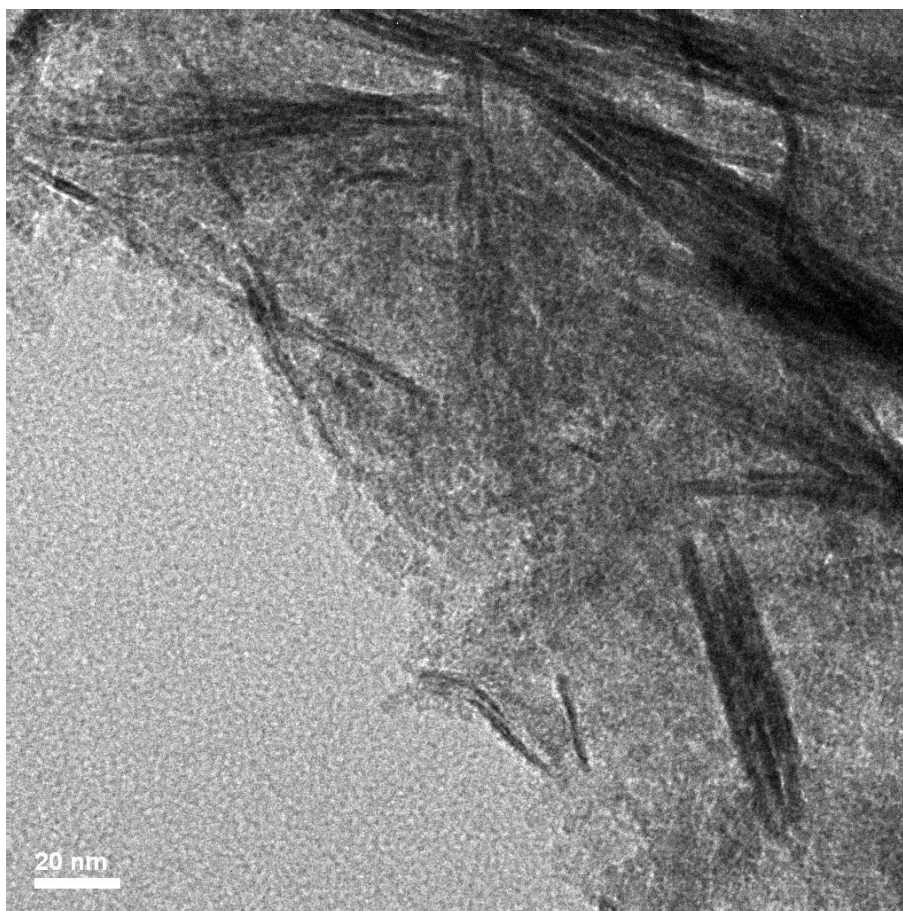

**Figure S7** TEM images of **100-Hc** (top) and **53-Hc** (bottom).

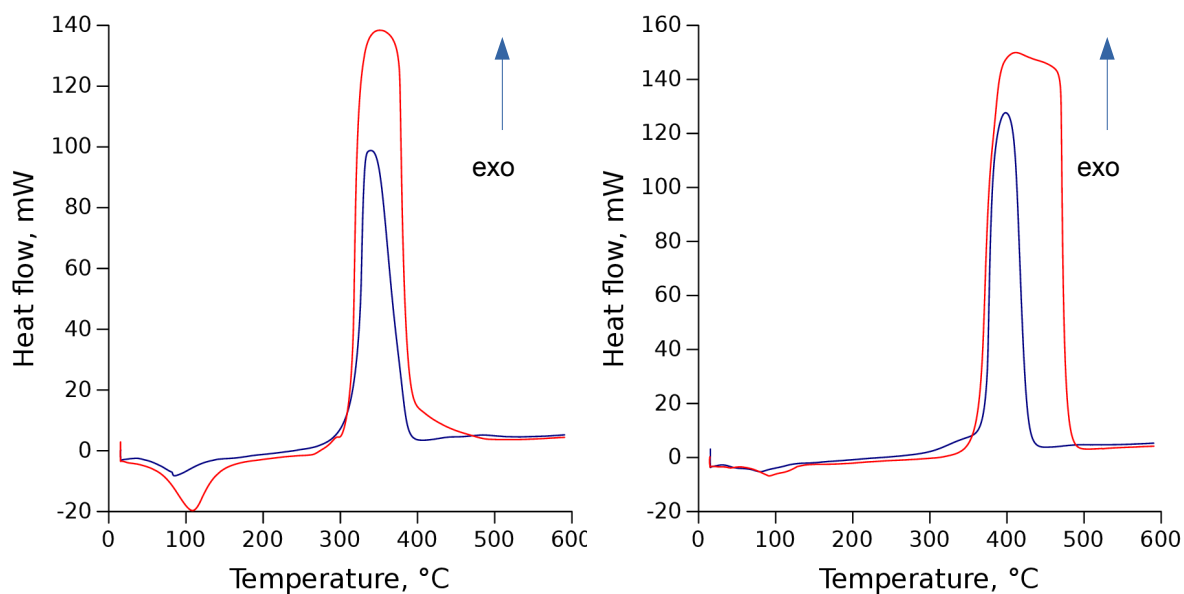

**Figure S8** Differential scanning calorimetry (DSC) plots for **100-Hc** (left) and **53-Hc** (right). Red line – initial MOFs, blue line – magnetic composites.

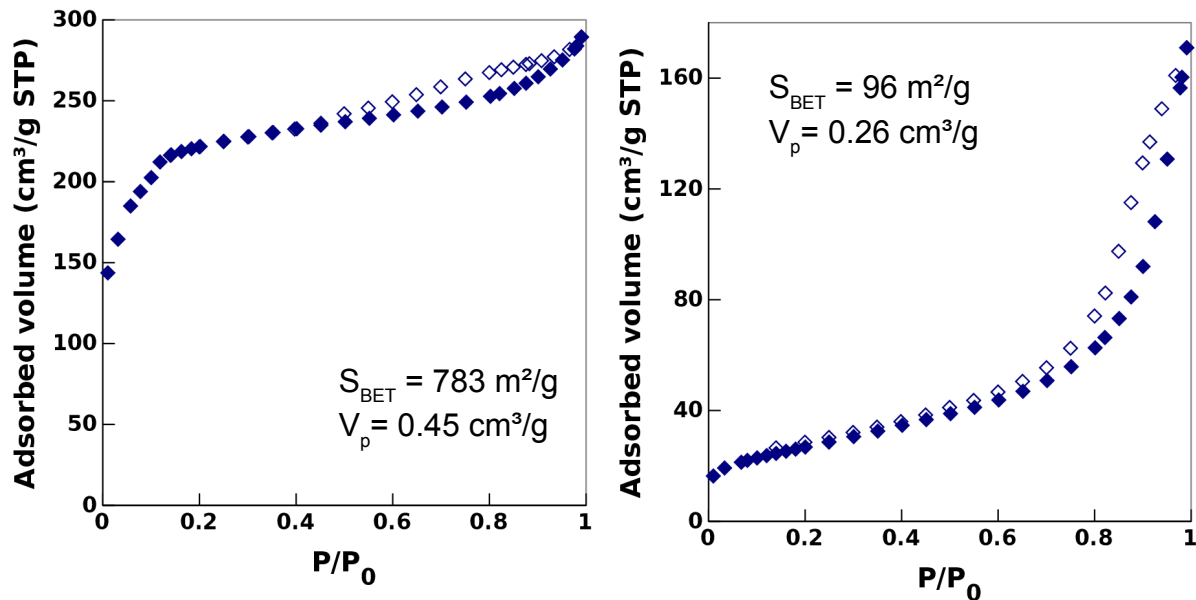

**Figure S9** Textural properties and N<sub>2</sub> adsorption-desorption isotherms measured at -196°C for **100-H** (left) and **53-H** (right). Full symbols- adsorption, empty symbols – desorption.



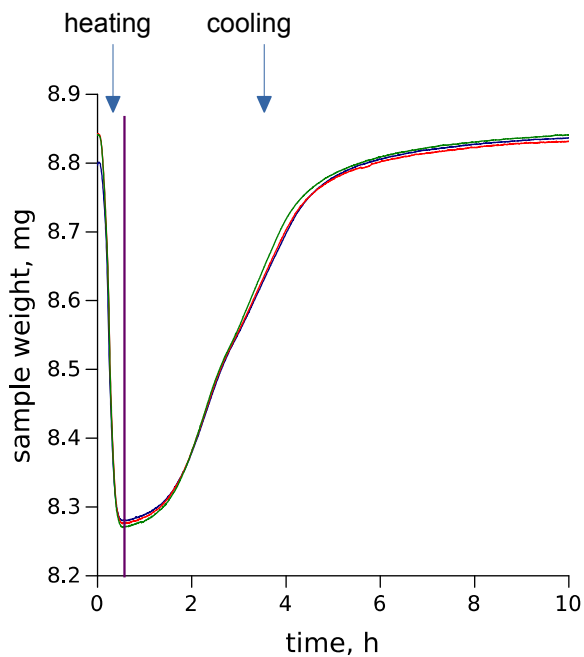

**Figure S10** Variation of the weight of **53-Hc** during three successive dehydration – hydration cycles realized through heating to 150°C followed by cooling to 15°C under ambient air (relative humidity ~ 30%). Different curve colors correspond to different cycles.

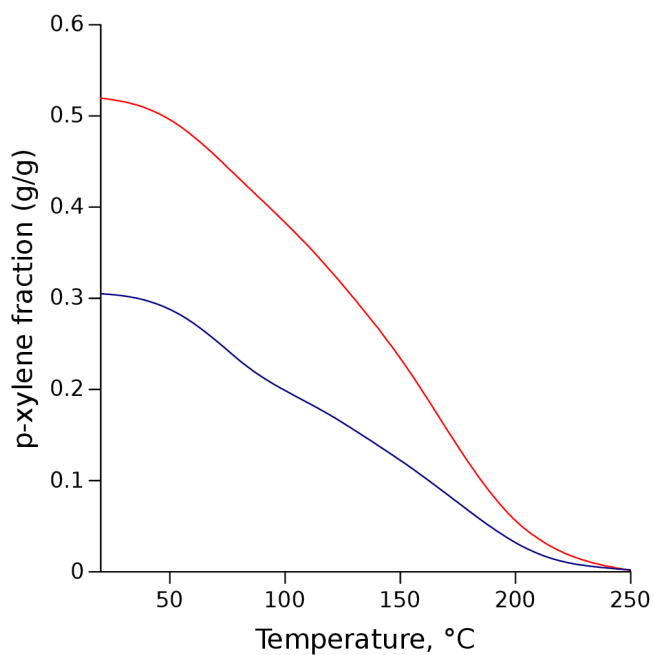

**Figure S11** Desorption profiles of p-xylene from MIL-100(Fe) (red) and from **100-Hc** composite (blue).
